# Supplementary material for: Patient-Derived Ovarian Cancer Spheroids Rely on PI3K-AKT Signaling Addiction for Cancer Stemness and Chemoresistance
Source: MDPI journal article supplement (doi:10.3390/cancers14040958), 2022-02-15
Supplement: s1 [file s1]

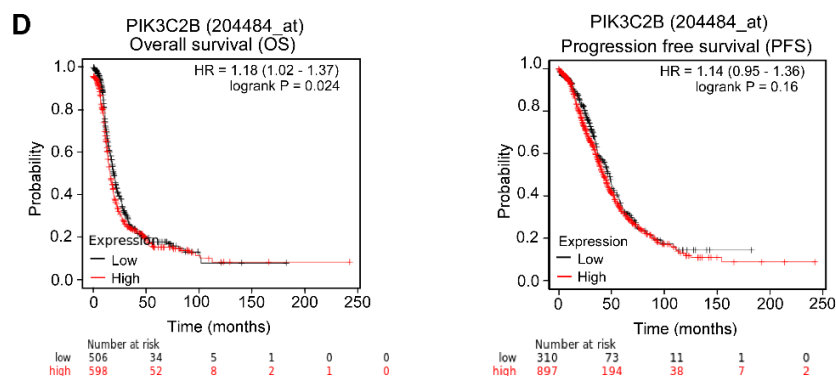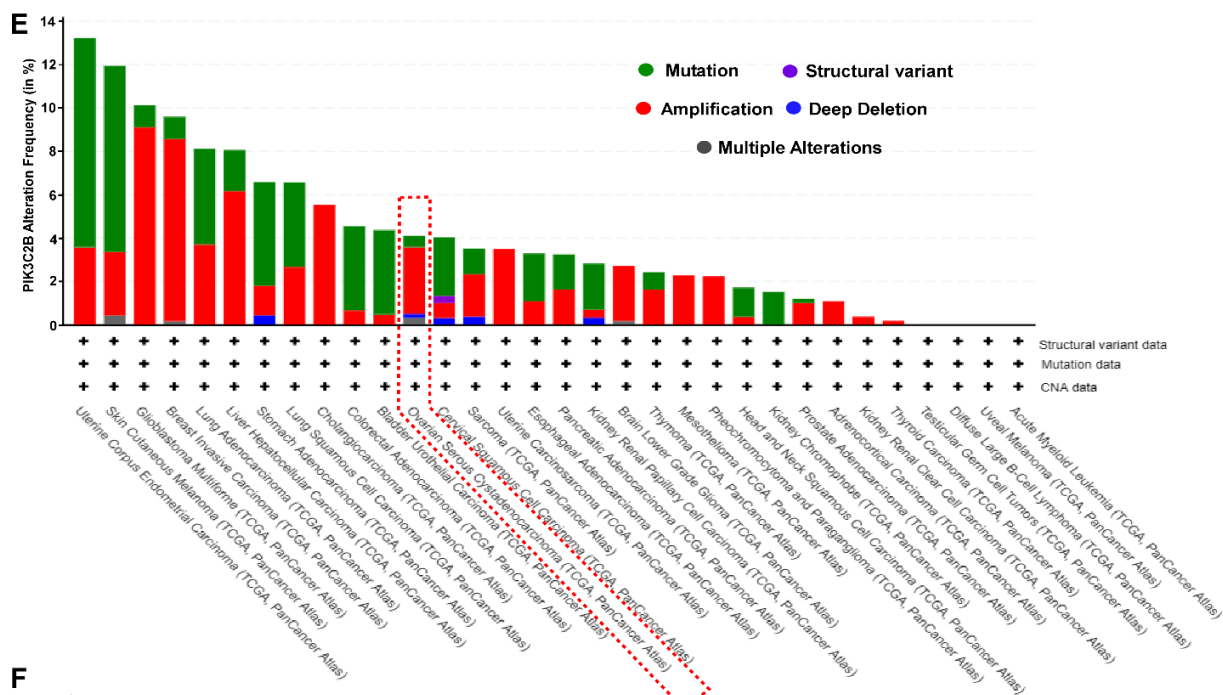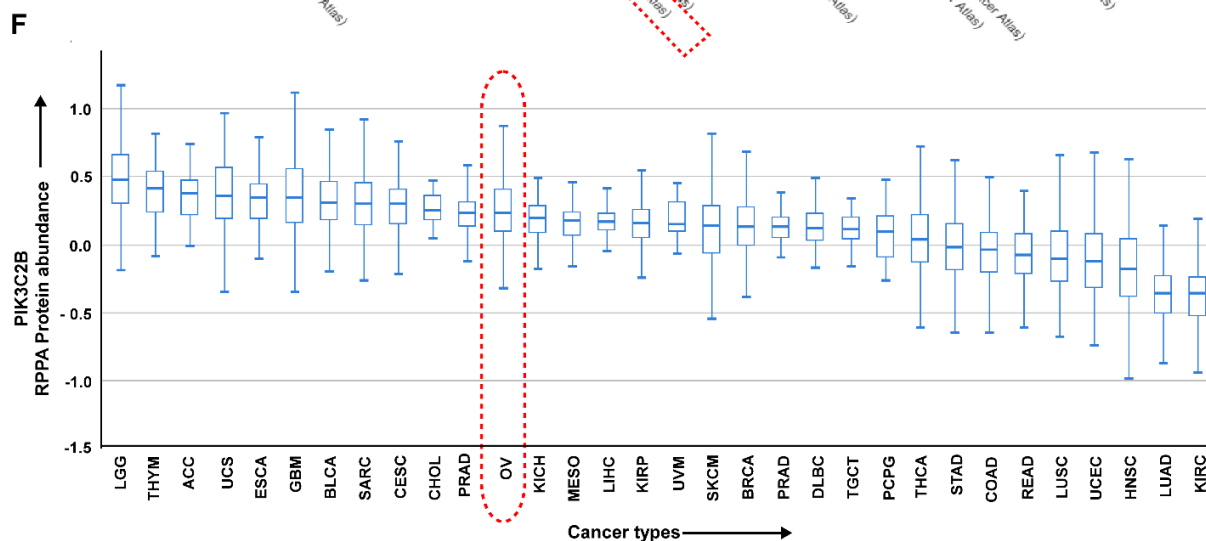

**G**

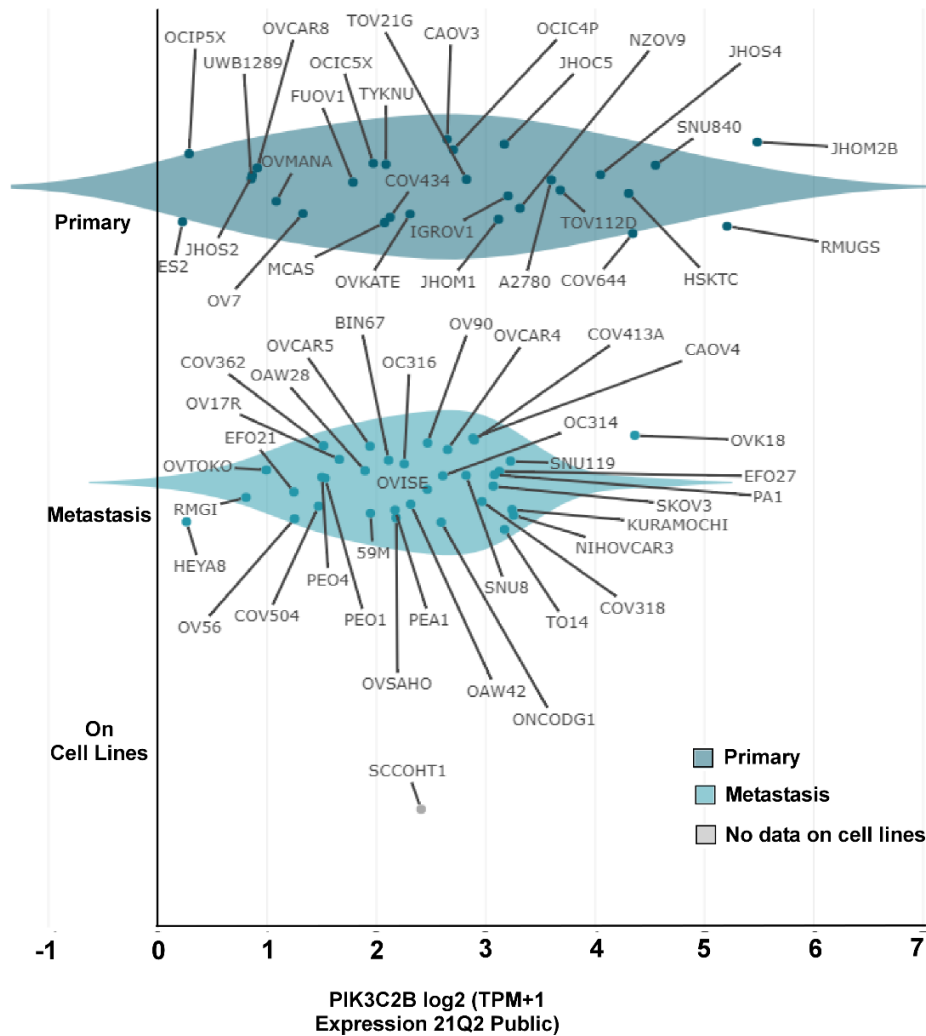

**Figure S1** (Related to main figure 1) Genomic alterations and expression of PI3K pathway components in TCGA ovarian cancer data. (A).A panel of biomarkers used for STR profiling to determine cell line identity of MCW-OV-SL3 cells. (B) Representative karyogram image of MCW-OSE-1 cells. (C) Genetic alterations and expression profile changes of PIK3C2B pathway components in HGSOV patients data obtained from TCGA data. Copy number and expression profile was generated using cBioPortal (<http://www.cbioportal.org> accessed on 8 April 2021). (D). Overall survival and progression free survival analysis in high grade serous ovarian cancer patients, whose samples were stratified based on high versus low expression of PIK3C2B expression using KM survival analysis plotter (<https://kmplot.com/analysis/> accessed on 8 April 2021). (E). Percentage frequency of different genetic and transcriptional alterations of PIK3C2B in various cancer tissues. (F). PIK3C2B protein abundance in various cancer tissues were determined in the Cancer Proteome Atlas datasets (<https://tcpaportal.org/tcpa/> accessed on 8 April 2021). Red dotted lines indicate abundance of PIK3C2B in ovarian cancer tissues. (G) PIK3C2B mRNA expression was determined in ovarian cancer cell lines DepMap (<https://depmap.org/portal/> accessed on 8 April 2021) and represented as log2 fold change analyzed using.

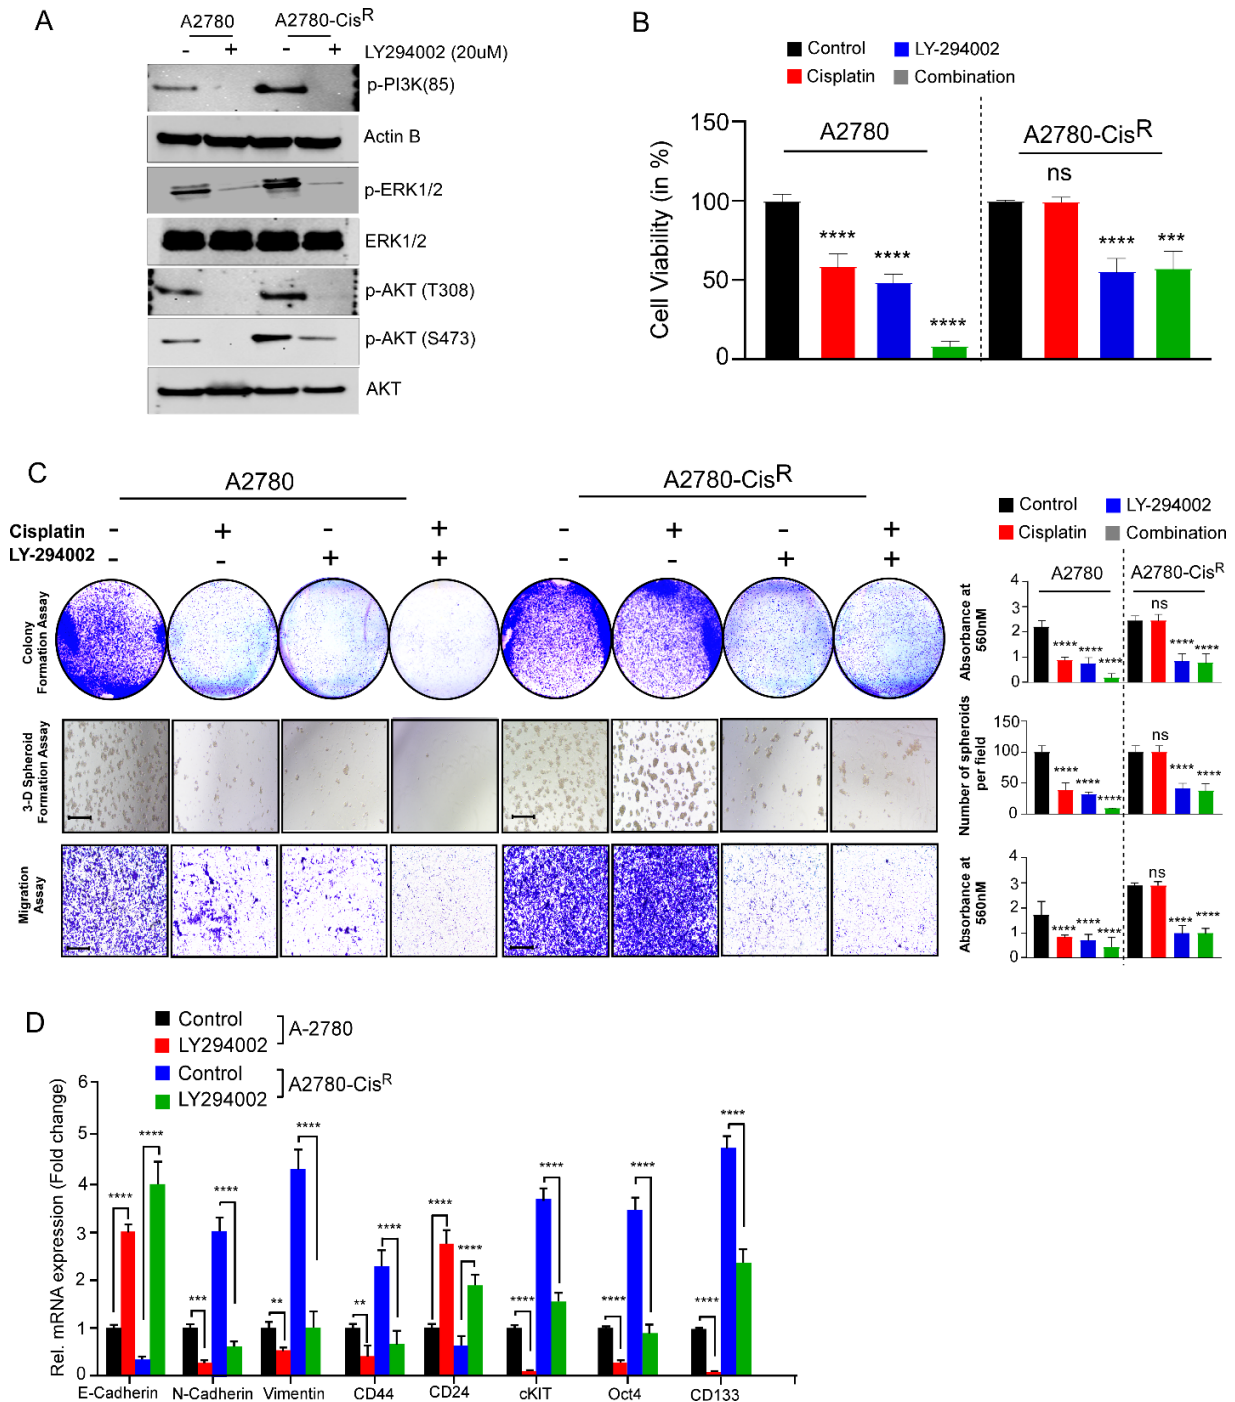

**Figure S2.** (Related to main figure 5) Inhibition of PI3K-AKT signaling axis by LY-294002 (PI3K inhibitor) significantly decrease EMT expression, cancer stemness and chemoresistance in A2780 cell line. (A). A2780 and A2780-CisR cells were treated for 48 h with either cisplatin, LY-294002 or their combination for 48 h. Cell lysates were prepared and immunoblotted using the antibodies indicated (see Figure-S3). (B). A2780 and A2780-CisR cells were treated with either cisplatin, LY-294002 or in combination for 48 h and the cell viability was assessed by MTT assay at 48h. Results are representative of three independent experiments performed in triplicates and error bars represent SE of the mean.(C). A2780 and A2780-CisR cell lines were

treated for 48 h with either cisplatin, LY294002 or in combination for 14 days for assessment of colony formation, then stained using 0.5% crystal violet and photographed. Stained colonies were dissolved and quantitated by measuring absorbance at 560nm and quantitated (right panel). For 3D formation assay, cells were grown on matrigel coated plate for seven days and then photographed using phase-contrast microscope (scale bars represent 500  $\mu$ m). Number of spheroid colonies were counted from three separate fields and quantitated (right panel). For cell migration assay, cells were plated on trans-well inserts without Matrigel for 12 h. Migrated cells were photographed (left panel). Scale bars represent 500  $\mu$ m and stained cells were dissolved using acetic acid and quantitated (right panel). Error bar indicates SE of triplicate determination. \*\*  $p < 0.01$ , \*\*\*;  $p < 0.001$ , \*\*\*\*;  $p < 0.0001$  statistically significant compared with respective controls. (D). Total RNA was isolated, and qPCR was performed from A2780 and A2780-CisR cell lines treated with either cisplatin or LY294002. mRNA expression was normalized to GAPDH. Bars represent SE of triplicate determinations.

### Related to main figure 1

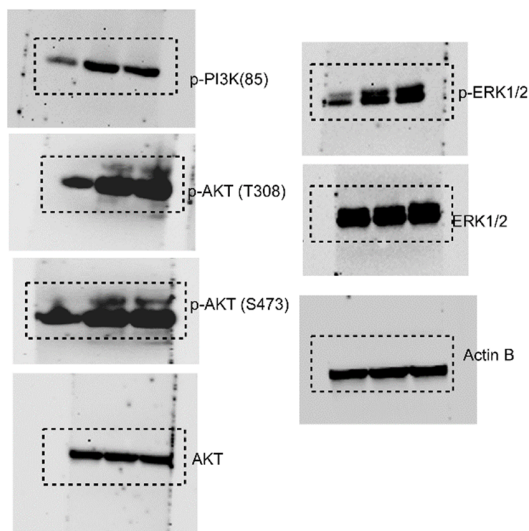

### Related to main figure 2

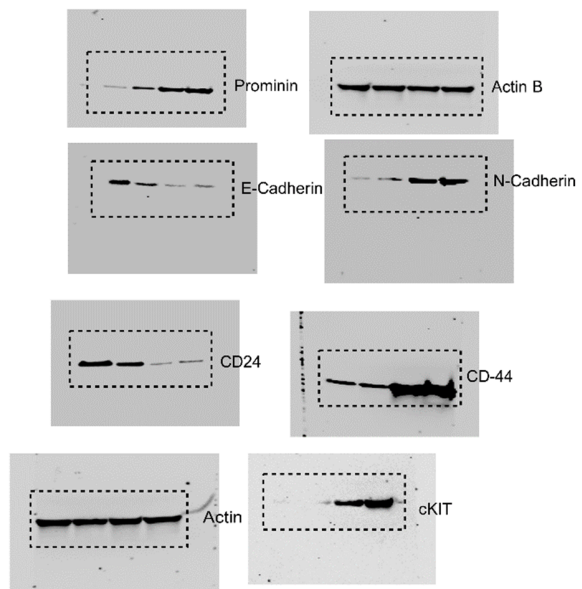

### Related to main figure 3

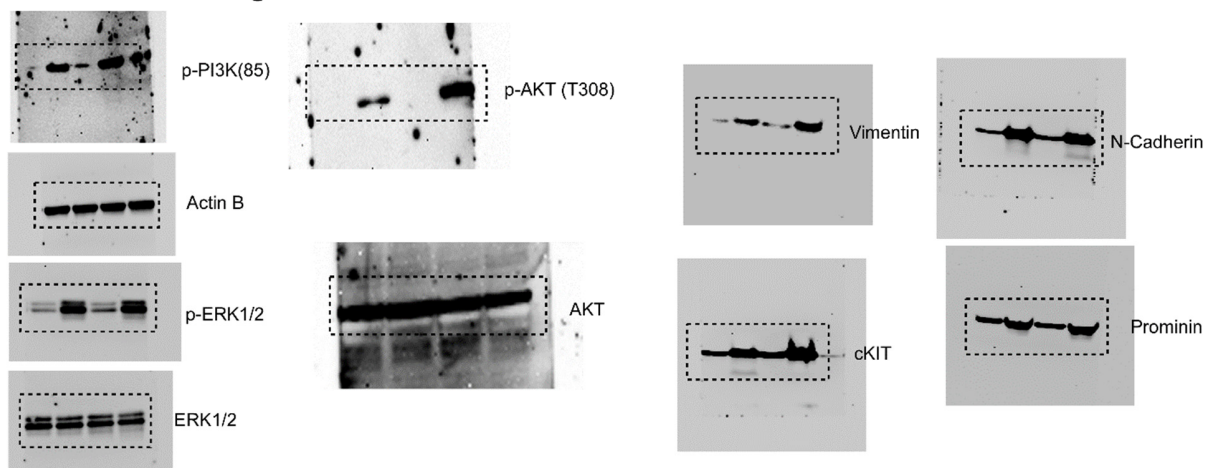



**Related to main figure 4-E**

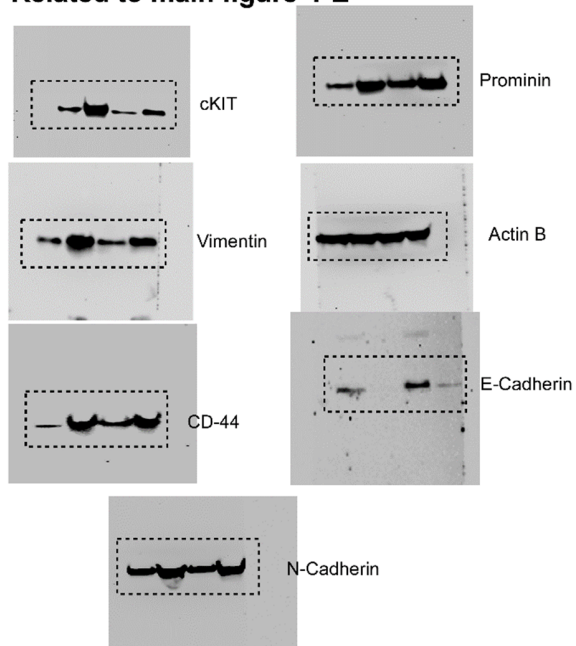

**Related to main figure 4-F**

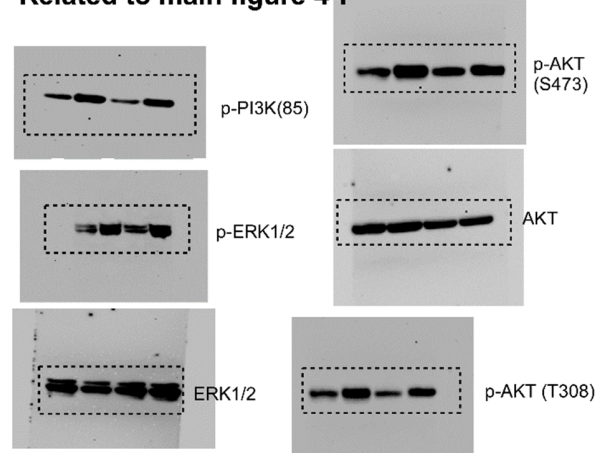

**Related to main figure 5**

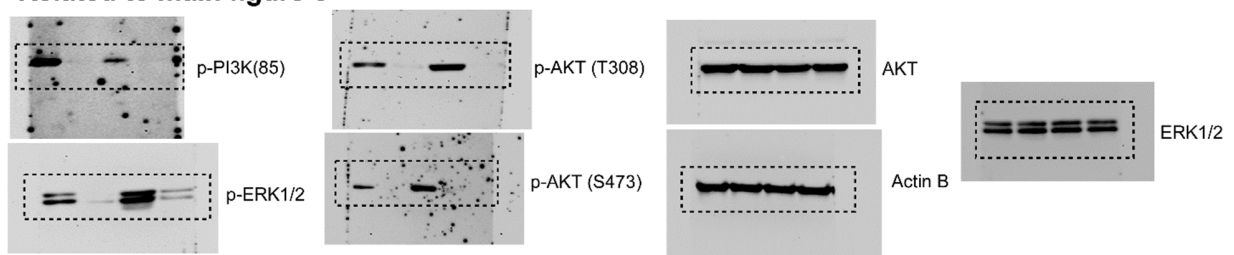

**Related to supplementary figure-2**

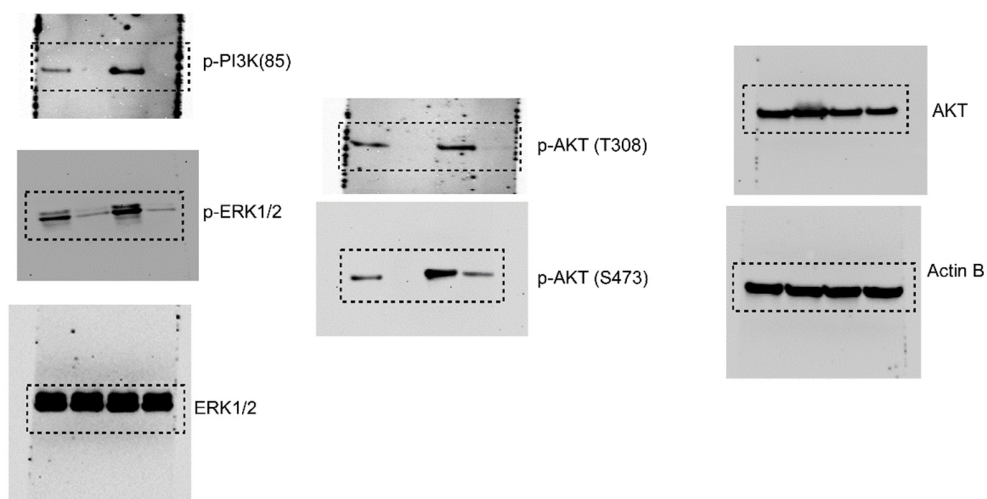

**Figure S3. Full western blot Figures**

**Table S1. related to method section of quantitative real-time PCR**  
**List of Primers were used for qPCR assays:**

| <b>Gene primers</b> | <b>Direction</b> | <b>Primer sequence</b>         |
|---------------------|------------------|--------------------------------|
| E- Cadherin         | Forward          | GCT GGA CCG AGA GAG TTT CC     |
| E- Cadherin         | Reverse          | CAA AAT CCA AGC CCG TGG TG     |
| N-Cadherin          | Forward          | TGA CAA TGA CCC CAC AGC TC     |
| N-Cadherin          | Reverse          | GTC CTG CTC ACC ACC ACT AC     |
| Vimentin            | Forward          | GCA GGA GGC AGA AGA ATG GT     |
| Vimentin            | Reverse          | CCA CTT CAC AGG TGA GGG AC     |
| CD44                | Forward          | CCT GGC AGC CCC GAT TAT TT     |
| CD44                | Reverse          | AAG GAC ACA CCC AAG CAA GG     |
| CD24                | Forward          | GAG AGA TAA CCC TGC CCG AG     |
| CD24                | Reverse          | CAA AAG AAA AGT CCG CGC CT     |
| CD117               | Forward          | GCA CAA TGG CAC GGT TGA AT     |
| CD117               | Reverse          | GGT GTG GGG ATG GAT TTG CT     |
| OCT4                | Forward          | GAG AGG CAA CCT GGA GAATTT     |
| OCT4                | Reverse          | ACT CGG ACC ACA TCC TTC T      |
| ACTB                | Forward          | GTC ATT CCA AAT ATG AGA TGC GT |
| ACTB                | Reverse          | GCT ATC ACC TCC CCT GTG TG     |

**Table-S2, REAGENT or RESOURCE SOURCE IDENTIFIER**

|                                      |                           |                                |
|--------------------------------------|---------------------------|--------------------------------|
| <b>Antibodies:</b>                   |                           |                                |
| Anti-cKIT                            | Cell Signaling Technology | Cat# 3074, RRID: AB_1147633    |
| Anti-Vimentin                        | Abcam                     | Cat# ab76601; RRID: AB_1566863 |
| Anti-Prominin                        | Cell Signaling Technology | Cat# 64326, RRID: AB_2721172   |
| Anti-Beta Actin                      | Santa Cruz Biotechnology  | Cat# sc-58679; RRID: AB_772478 |
| Anti-p-PI3K (85)                     | Cell Signaling Technology | Cat# 4257; RRID: AB_659889     |
| Anti-pERK1/2                         | Cell Signaling Technology | Cat# 5726; RRID: AB_2797617    |
| Anti-ERK1/2                          | Cell Signaling Technology | Cat# 9108; RRID: AB_2141156    |
| Anti-pAKT (T308)                     | Cell Signaling Technology | Cat# #13038; RRID: AB_2629447  |
| Anti-pAKT (S473)                     | Cell Signaling Technology | Cat# 4060, RRID: AB_2315049    |
| Anti-AKT                             | Cell Signaling Technology | Cat# 2920; RRID: AB_1147620    |
| Anti-rabbit IgG, HRP-linked Antibody | Cell Signaling Technology | Cat# 7074, RRID: AB_2099233    |
| Anti-mouse IgG, HRP-linked Antibody  | Cell Signaling Technology | Cat# 7076, RRID: AB_330924     |
| <b>Chemicals:</b>                    |                           |                                |
| DMEM                                 | Thermo Fisher Scientific  | Cat# 10569010                  |
| DMEM/F12 1:1                         | Thermo Fisher Scientific  | Cat# 10565018                  |
| FBS                                  | Atlanta Biologicals       | Cat# H17112                    |
| Antibiotic (Penicillin/Streptomycin) | Thermo Fisher Scientific  | Cat# 15140122                  |
| DMSO                                 | Sigma Aldrich             | Cat# D8418                     |
| Trypan Blue                          | Sigma Aldrich             | Cat# T8154                     |
| Glutaraldehyde                       | Sigma Aldrich             | Cat# G7651                     |
| Crystal Violet                       | Sigma Aldrich             | Cat# C6158                     |
| Acetic acid                          | Sigma Aldrich             | Cat# A6283                     |
| Trypsin                              | Thermo Fisher Scientific  | Cat# 15400054                  |



|                                   |                          |                  |
|-----------------------------------|--------------------------|------------------|
|                                   |                          |                  |
| Tween 20                          | Bio-Rad                  | Cat# 1706531     |
| BSA                               | Sigma Aldrich            | Cat# A7906       |
| RNeasy kit                        | QIAGEN                   | Cat# 74104       |
| iScript cDNA synthesis kit        | Bio-Rad                  | Cat# 1708891     |
| iTaq Universal SYBR Green PCR Kit | Bio-Rad                  | Cat# 1725121     |
| Formamide                         | Sigma Aldrich            | Cat# F9037-100ML |
| TURBO DNase                       | Invitrogen               | Cat# AM2238      |
| 10% Formalin fixative             | VWR                      | Cat# 16004-121   |
| HBSS                              | Thermo Fisher Scientific | Cat# 14060040    |
| RNase A                           | Invitrogen               | Cat# AM2271      |
| Proteinase K                      | Invitrogen               | Cat# 25530049    |
| PBS                               | Sigma Aldrich            | Cat# P5493       |
| RIPA buffer                       | Thermo Fisher Scientific | Cat# 89900       |
| MTT                               | Sigma Aldrich            | Cat# M5655       |
